# Supplementary material
Source: publisher figshare collection journal article supplement (https://tandf.figshare.com/articles/dataset/_/1577601)
Supplement: Supplementary file 1 [file 1]

Archive with 9 entries (9 files):
- iiht_a_945106_sm0001.pdf
- iiht_a_945106_sm0002.pdf
- iiht_a_945106_sm0003.pdf
- iiht_a_945106_sm0004.pdf
- iiht_a_945106_sm0005.pdf
- iiht_a_945106_sm0006.pdf
- iiht_a_945106_sm0007.pdf
- iiht_a_945106_sm0008.pdf
- iiht_a_945106_sm0009.pdf
